# Supplementary material
Source: MDPI journal article supplement (https://www.mdpi.com/2073-4441/15/5/951)
Supplement: s1 [file s1]

Supplementary Figure S1: Results of MALDI TOF analysis

Bruker Daltonik MALDI Biotyper  
Classification Results

Bruker Logo

Project Info:

Project Name:  
Project Description:  
Project Owner:  
Project Creation Date/Time:  
Project Analyte Count:  
Project Type:  
Validation:  
Validation Position:

Banika vedy TUCZVO\_18.11\_estrakita  
adina@FPI-KB-FLX-PC  
2021-11-18T12:52:39.202  
44  
Development:  
not present

Result Overview

| Analyte Name           | Analyte ID | Organism (best match)            | Score Value | Organism (second best match)     | Score Value |
|------------------------|------------|----------------------------------|-------------|----------------------------------|-------------|
| $\Delta 1$<br>(-) (C)  | 1.1        | not reliable identification      | 1.558       | not reliable identification      | 1.558       |
| $\Delta 2$<br>(-) (C)  | 1.3        | not reliable identification      | 1.554       | not reliable identification      | 1.554       |
| $\Delta 3$<br>(-) (C)  | 1.4        | not reliable identification      | 1.548       | not reliable identification      | 1.548       |
| $\Delta 4$<br>(-) (B)  | 1.5        | <i>Pseudomonas monteilii</i>     | 1.523       | not reliable identification      | 1.495       |
| $\Delta 5$<br>(-) (C)  | 2.2        | not reliable identification      | 1.505       | not reliable identification      | 1.510       |
| $\Delta 6$<br>(-) (B)  | 2.3        | <i>Aeromonas hydrophila</i>      | 1.518       | not reliable identification      | 1.493       |
| $\Delta 7$<br>(+) (B)  | 2.4        | <i>Lysinibacillus fusiformis</i> | 1.509       | <i>Lysinibacillus fusiformis</i> | 1.503       |
| $\Delta 8$<br>(-) (B)  | 2.5        | <i>Bacillus cereus</i>           | 1.547       | <i>Bacillus cereus</i>           | 1.523       |
| $\Delta 9$<br>(-) (C)  | 3.2        | not reliable identification      | 1.509       | not reliable identification      | 1.498       |
| $\Delta 10$<br>(-) (B) | 3.3        | <i>Bacillus cereus</i>           | 1.513       | not reliable identification      | 1.503       |
| $\Delta 11$<br>(-) (C) | 4.1        | not reliable identification      | 1.507       | not reliable identification      | 1.507       |
| $\Delta 12$<br>(-) (C) | 4.2        | not reliable identification      | 1.498       | not reliable identification      | 1.501       |
| $E 1$<br>(-) (C)       | 4.3        | not reliable identification      | 1.503       | not reliable identification      | 1.515       |
| $E 2$<br>(-) (C)       | 4.4        | not reliable identification      | 1.503       | not reliable identification      | 1.508       |
| $E 3$<br>(-) (C)       | 4.5        | not reliable identification      | 1.504       | not reliable identification      | 1.505       |
| $E 4$<br>(-) (C)       | 4.6        | not reliable identification      | 1.511       | not reliable identification      | 1.505       |
| $E 5$<br>(-) (C)       | 5.1        | not reliable identification      | 1.504       | not reliable identification      | 1.507       |
| $E 6$<br>(-) (C)       | 5.2        | not reliable identification      | 1.503       | not reliable identification      | 1.503       |
| $E 7$<br>(+) (B)       | 5.5        | <i>Pseudomonas fragi</i>         | 1.505       | not reliable identification      | 1.499       |
| $E 8$<br>(-) (C)       | 5.6        | not reliable identification      | 1.504       | not reliable identification      | 1.510       |
| $E 9$<br>(-) (C)       | 6.2        | not reliable identification      | 1.507       | not reliable identification      | 1.508       |
| $E 10$<br>(-) (C)      | 6.3        | not reliable identification      | 1.503       | not reliable identification      | 1.505       |
| $E 11$<br>(-) (C)      | 6.4        | not reliable identification      | 1.509       | not reliable identification      | 1.505       |
| $O 1$<br>(+) (B)       | 1.1        | <i>Providencia rangelyi</i>      | 1.511       | not reliable identification      | 1.503       |
| $O 2$<br>(-) (C)       | 1.3        | not reliable identification      | 1.509       | not reliable identification      | 1.505       |
| $O 3$<br>(++) (A)      | 1.4        | <i>Morganella morganii</i>       | 1.525       | <i>Morganella morganii</i>       | 1.501       |
| $O 4$<br>(+) (B)       | 1.5        | <i>Pseudomonas monteilii</i>     | 1.53        | <i>Pseudomonas monteilii</i>     | 1.534       |
| $O 5$<br>(-) (C)       | 2.2        | not reliable identification      | 1.505       | not reliable identification      | 1.507       |
| $O 6$<br>(+) (B)       | 2.3        | <i>Aeromonas hydrophila</i>      | 1.509       | <i>Aeromonas hydrophila</i>      | 1.526       |
| $O 7$<br>(+++)(B)      | 2.4        | <i>Lysinibacillus fusiformis</i> | 1.540       | <i>Lysinibacillus fusiformis</i> | 1.531       |
| $O 8$<br>(+) (B)       | 2.5        | <i>Bacillus cereus</i>           | 1.551       | <i>Bacillus cereus</i>           | 1.553       |
| $O 9$<br>(++) (A)      | 3.2        | <i>Bacillus cereus</i>           | 1.559       | <i>Bacillus cereus</i>           | 1.569       |
| $O 10$<br>(-) (B)      | 3.3        | <i>Bacillus cereus</i>           | 1.551       | <i>Bacillus cereus</i>           | 1.551       |
| $O 11$<br>(-) (B)      | 4.1        | <i>Bacillus atrophaeus</i>       | 1.549       | <i>Bacillus atrophaeus</i>       | 1.528       |
| $O 12$<br>(+) (C)      | 4.2        | <i>Serratia liquefaciens</i>     | 1.518       | <i>Actinobacter bozweni</i>      | 1.507       |
| $H 1$<br>(+) (B)       | 4.3        | <i>Serratia liquefaciens</i>     | 1.550       | not reliable identification      | 1.545       |
| $H 2$<br>(-) (C)       | 4.4        | not reliable identification      | 1.551       | not reliable identification      | 1.551       |
| $H 3$<br>(+) (B)       | 4.5        | <i>Bacillus atrophaeus</i>       | 1.559       | <i>Bacillus atrophaeus</i>       | 1.529       |
| $H 4$<br>(-) (C)       | 4.6        | not reliable identification      | 1.554       | not reliable identification      | 1.555       |
| $H 5$<br>(++) (A)      | 5.1        | <i>Bacillus cereus</i>           | 1.565       | <i>Bacillus cereus</i>           | 1.565       |
| $H 6$<br>(++) (A)      | 5.2        | <i>Bacillus cereus</i>           | 1.567       | <i>Bacillus cereus</i>           | 1.568       |
| $H 7$<br>(-) (C)       | 5.5        | not reliable identification      | 1.559       | not reliable identification      | 1.559       |
| $H 8$<br>(+) (B)       | 5.6        | <i>Pseudomonas fluorescens</i>   | 1.574       | <i>Pseudomonas varians</i>       | 1.562       |
| $H 9$<br>(-) (C)       | 6.2        | not reliable identification      | 1.566       | not reliable identification      | 1.555       |
| $H 10$<br>(-) (C)      | 6.3        | not reliable identification      | 1.563       | not reliable identification      | 1.563       |
| $H 11$<br>(-) (B)      | 6.4        | <i>Bacillus pumilus</i>          | 1.586       | not reliable identification      | 1.575       |
